# Supplementary material for: Effects of Different Stroking Styles on Behaviour and Cardiac Parameters in Heifers
Source: PubMed Central journal article supplement (PMC7143138; doi:10.3390/ani10030426), 2020-03-04
Supplement: animals-10-00426-s001.pdf [file animals-10-00426-s001.pdf]

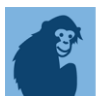

# Supplementary Materials: Effects of Different Stroking Styles on Behaviour and Cardiac Parameters in Heifers

Annika Lange <sup>1,\*</sup>, Sandra Franzmayr <sup>1</sup>, Vera Wisenöcker <sup>1</sup>, Andreas Futschik <sup>2</sup>, Susanne Waiblinger <sup>1</sup> and Stephanie Lürzel <sup>1</sup>

<sup>1</sup> Institute of Animal Welfare Science, Department for Farm Animals and Veterinary Public Health, University of Veterinary Medicine, Vienna, Veterinärplatz 1, 1210 Vienna, Austria; s.franzmayr@liwest.at (S.F.); vera.wisenoecker@a1.net (V.W.); susanne.waiblinger@vetmeduni.ac.at (S.W.); stephanie.luerzel@vetmeduni.ac.at (S.L.)

<sup>2</sup> Department of Applied Statistics, Johannes Kepler University Linz, Altenberger Str. 69, 4040 Linz, Austria; andreas.futschik@jku.at

\* Correspondence: annika.lange@vetmeduni.ac.at

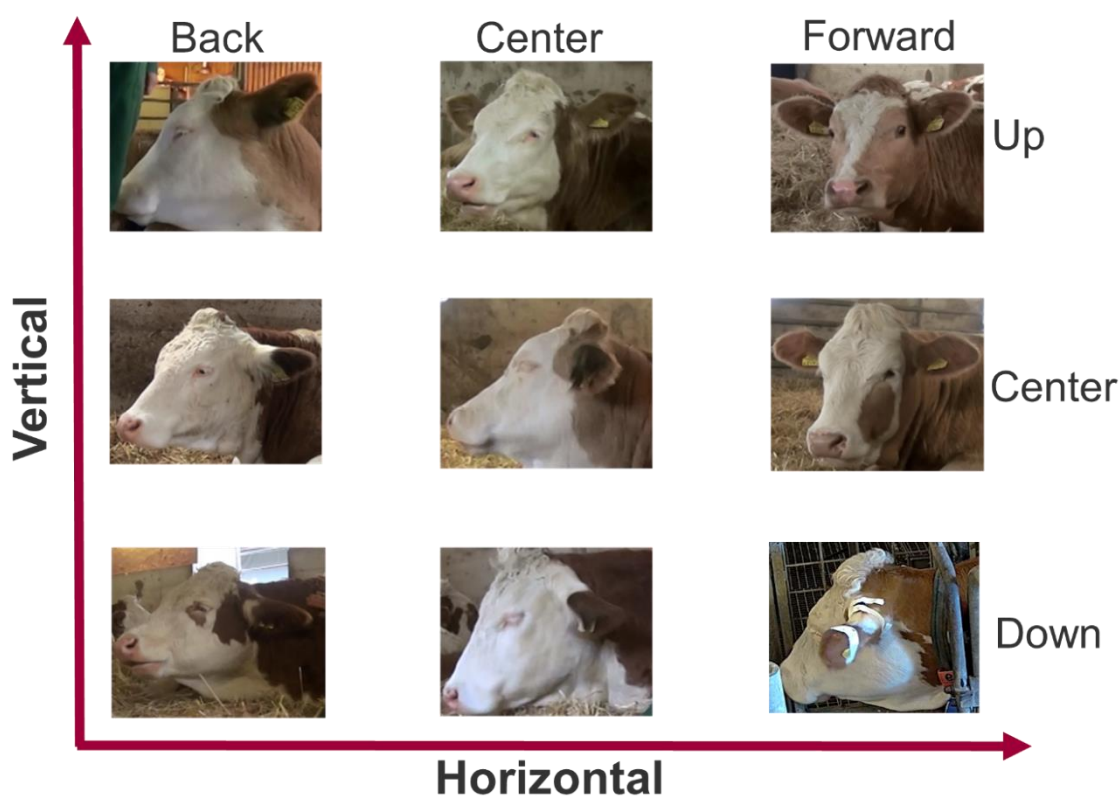

**Figure S1.** Example photographs of ear positions. The ear postures are described relative to the vertical axis, an imaginary line through the poll and the caudo-ventral edge of the mandible angle, and the horizontal axis, an imaginary line between the bases of the ears. “Back” means the ear is pointing towards the back of the head, “forward” refers to the rostral end of the head, “up” describes the ear pointing towards the dorsal and “down” towards the ventral part of the head. The example photograph for “forward down” was taken in another experiment because the position did not occur in our study.

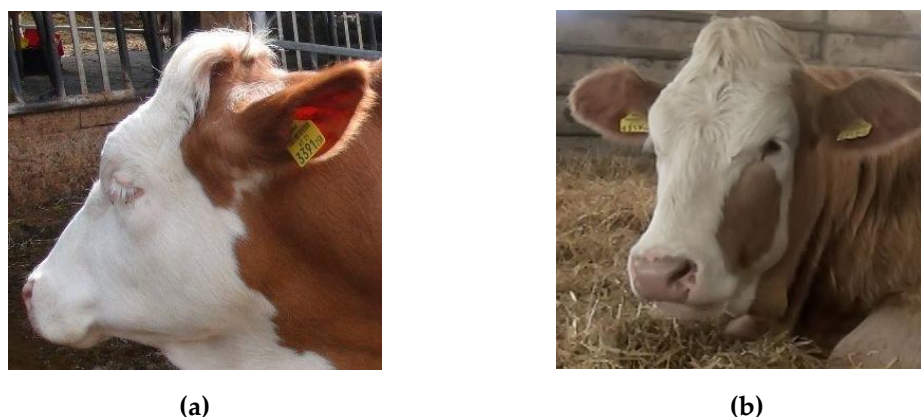

**Figure S2.** Example photographs of ear positions with lines indicating (a) the vertical axis (yellow, through the poll and the caudo-ventral edge of the mandible angle) and (b) the horizontal axis (red, between the bases of the ears).

**Table S1.** Full and reduced models for the different behaviours of the heifers ( $n = 28$ ): comparison between the different stroking styles over the three phases. Statistically significant results appear in bold. CL: confidence limits. Statistics: GLMMs.

| <b>Full model neck stretching</b>                                                      |                                                        |               |              |                     |                     |               |          |                   |
|----------------------------------------------------------------------------------------|--------------------------------------------------------|---------------|--------------|---------------------|---------------------|---------------|----------|-------------------|
| Part                                                                                   | Effects                                                | Coefficients  | SE           | CL <sub>lower</sub> | CL <sub>upper</sub> | $\chi^2$      | df       | <i>p</i>          |
| Mean                                                                                   | (Intercept)                                            | -3.270        | 0.152        | -3.599              | -3.012              |               |          | -(1)              |
|                                                                                        | Treatment <sup>(2)</sup>                               | 0.280         | 0.206        | -0.148              | 0.687               |               |          | -                 |
|                                                                                        | Phase (STR) <sup>(3)</sup>                             | 0.949         | 0.178        | 0.626               | 1.297               |               |          | -                 |
|                                                                                        | Phase (POST) <sup>(3)</sup>                            | -0.043        | 0.153        | -0.344              | 0.26                |               |          | -                 |
|                                                                                        | Test <sup>(2)</sup>                                    | 0.005         | 0.043        | -0.082              | 0.095               | 0.013         | 1        | 0.910             |
|                                                                                        | Treatment:Phase <sup>(4)</sup>                         |               |              |                     |                     | 1.311         | 2        | 0.519             |
|                                                                                        | Treatment <sup>(2)</sup> × Phase (STR) <sup>(3)</sup>  | -0.214        | 0.220        | -0.654              | 0.244               |               |          | -                 |
|                                                                                        | Treatment <sup>(2)</sup> × Phase (POST) <sup>(3)</sup> | 0.011         | 0.218        | -0.401              | 0.469               |               |          | -                 |
| Precision                                                                              | (Intercept)                                            | 1.852         | 0.127        | 1.646               | 2.175               |               |          | -                 |
|                                                                                        | <b>Treatment<sup>(2)</sup></b>                         | <b>-0.394</b> | <b>0.171</b> | <b>-0.756</b>       | <b>-0.04</b>        | <b>5.258</b>  | <b>1</b> | <b>0.022</b>      |
| <b>Reduced model neck stretching without insignificant treatment×phase interaction</b> |                                                        |               |              |                     |                     |               |          |                   |
| Part                                                                                   | Effects                                                | Coefficients  | SE           | CL <sub>lower</sub> | CL <sub>upper</sub> | $\chi^2$      | df       | <i>p</i>          |
| Mean                                                                                   | (Intercept)                                            | -3.223        | 0.135        | -3.377              | -2.934              |               |          | -                 |
|                                                                                        | Treatment <sup>(2)</sup>                               | 0.178         | 0.148        | -0.108              | 0.464               | 1.446         | 1        | 0.229             |
|                                                                                        | <b>Phase (STR)<sup>(3)</sup></b>                       | <b>0.848</b>  | <b>0.147</b> | <b>0.569</b>        | <b>1.127</b>        | <b>27.527</b> | <b>2</b> | <b>&lt; 0.001</b> |
|                                                                                        | Phase (POST) <sup>(3)</sup>                            | -0.037        | 0.109        | -0.250              | 0.177               |               |          | -                 |
|                                                                                        | Test <sup>(2)</sup>                                    | 0.008         | 0.043        | -0.077              | 0.099               | 0.031         | 1        | 0.861             |
| Precision                                                                              | (Intercept)                                            | 1.831         | 0.125        | 1.634               | 2.119               |               |          | -                 |
|                                                                                        | <b>Treatment<sup>(2)</sup></b>                         | <b>-0.349</b> | <b>0.167</b> | <b>-0.663</b>       | <b>-0.014</b>       | <b>4.345</b>  | <b>1</b> | <b>0.037</b>      |
| <b>Full model contact<sup>(5)</sup></b>                                                |                                                        |               |              |                     |                     |               |          |                   |
| Part                                                                                   | Effects                                                | Coefficients  | SE           | CL <sub>lower</sub> | CL <sub>upper</sub> | $\chi^2$ or z | df       | <i>p</i>          |
| Mean                                                                                   | (Intercept)                                            | -2.937        | 0.186        | -3.267              | -2.695              |               |          | -                 |
|                                                                                        | Treatment <sup>(2)</sup>                               | -0.730        | 0.254        | -1.100              | -0.341              | -2.873        |          | 0.004             |
|                                                                                        | Phase (STR) <sup>(3)</sup>                             | 0.383         | 0.197        | 0.100               | 0.712               | 1.947         |          | 0.052             |

|                                                                                                     | Phase (POST) <sup>(3)</sup>                            | 0.084        | 0.197        | -0.210              | 0.390               | 0.429               | 0.668    |                   |
|-----------------------------------------------------------------------------------------------------|--------------------------------------------------------|--------------|--------------|---------------------|---------------------|---------------------|----------|-------------------|
|                                                                                                     | Test <sup>(2)</sup>                                    | -0.061       | 0.057        | -0.145              | 0.024               | -1.062              | 0.288    |                   |
|                                                                                                     | Treatment <sup>(2)</sup> × Phase (STR) <sup>(3)</sup>  | 0.054        | 0.272        | -0.382              | 0.479               | 0.197               | 0.844    |                   |
|                                                                                                     | Treatment <sup>(2)</sup> × Phase (POST) <sup>(3)</sup> | -0.046       | 0.273        | -0.460              | 0.359               | -0.169              | 0.865    |                   |
| Precision                                                                                           | (Intercept)                                            | 1.591        | 0.120        | 1.418               | 1.903               |                     | -        |                   |
|                                                                                                     | <b>Treatment<sup>(2)</sup></b>                         | <b>0.833</b> | <b>0.172</b> | 0.504               | 1.198               | <b>4.851</b>        | <b>1</b> | <b>&lt; 0.001</b> |
| <b>Reduced model <i>contact</i> without insignificant treatment×phase interaction<sup>(5)</sup></b> |                                                        |              |              |                     |                     |                     |          |                   |
| Part                                                                                                | Effects                                                | Coefficients | SE           | CL <sub>lower</sub> | CL <sub>upper</sub> | χ <sup>2</sup> or z | df       | p                 |
| Mean                                                                                                | (Intercept)                                            | -2.939       | 0.164        | -3.549              | -3.129              |                     |          | -                 |
|                                                                                                     | Treatment <sup>(2)</sup>                               | -0.723       | 0.190        | -1.004              | -0.418              | -3.805              |          | < 0.001           |
|                                                                                                     | <b>Phase (STR)<sup>(3)</sup></b>                       | 0.410        | 0.137        | 0.204               | 0.637               | 2.996               |          | <b>0.003</b>      |
|                                                                                                     | Phase (POST) <sup>(3)</sup>                            | 0.060        | 0.136        | -0.145              | 0.285               | 0.441               |          | 0.66              |
|                                                                                                     | Test <sup>(2)</sup>                                    | -0.060       | 0.057        | -0.147              | 0.028               | -1.055              |          | 0.292             |
| Precision                                                                                           | (Intercept)                                            | 1.593        | 0.120        | 1.401               | 1.895               |                     |          | -                 |
|                                                                                                     | <b>Treatment<sup>(2)</sup></b>                         | <b>0.826</b> | <b>0.171</b> | 0.483               | 1.158               | <b>4.851</b>        | <b>1</b> | <b>&lt; 0.001</b> |
| <b>Full model <i>eyes closed</i></b>                                                                |                                                        |              |              |                     |                     |                     |          |                   |
| Part                                                                                                | Effects                                                | Coefficients | SE           | CL <sub>lower</sub> | CL <sub>upper</sub> | χ <sup>2</sup>      | df       | p                 |
| Mean                                                                                                | (Intercept)                                            | -1.162       | 0.167        | -1.506              | -0.832              |                     |          | -                 |
|                                                                                                     | Treatment <sup>(2)</sup>                               | 0.296        | 0.205        | -0.124              | 0.713               |                     |          | -                 |
|                                                                                                     | Phase (STR) <sup>(3)</sup>                             | 0.073        | 0.182        | -0.279              | 0.434               |                     |          | -                 |
|                                                                                                     | Phase (POST) <sup>(3)</sup>                            | 0.087        | 0.176        | -0.247              | 0.443               |                     |          | -                 |
|                                                                                                     | Test <sup>(2)</sup>                                    | 0.102        | 0.084        | -0.064              | 0.279               | 1.446               | 1        | 0.229             |
|                                                                                                     | Treatment:Phase <sup>(4)</sup>                         |              |              |                     |                     | 2.612               | 2        | 0.270             |
|                                                                                                     | Treatment <sup>(2)</sup> × Phase (STR) <sup>(3)</sup>  | -0.388       | 0.257        | -0.931              | 0.122               |                     |          | -                 |
|                                                                                                     | Treatment <sup>(2)</sup> × Phase (POST) <sup>(3)</sup> | -0.062       | 0.251        | -0.576              | 0.461               |                     |          | -                 |
| Precision                                                                                           | (Intercept)                                            | 0.239        | 0.112        | 0.071               | 0.446               |                     |          | -                 |
|                                                                                                     | <b>Treatment<sup>(2)</sup></b>                         | -0.137       | 0.128        | -0.381              | 0.120               | 1.146               | 1        | 0.284             |
| <b>Full model <i>back up</i></b>                                                                    |                                                        |              |              |                     |                     |                     |          |                   |
| Part                                                                                                | Effects                                                | Coefficients | SE           | CL <sub>lower</sub> | CL <sub>upper</sub> | χ <sup>2</sup>      | df       | p                 |
| Mean                                                                                                | (Intercept)                                            | 0.191        | 0.178        | -0.196              | 0.514               |                     |          | -                 |
|                                                                                                     | Treatment <sup>(2)</sup>                               | 0.181        | 0.190        | -0.191              | 0.559               |                     |          | -                 |
|                                                                                                     | Phase (STR) <sup>(3)</sup>                             | 0.241        | 0.161        | -0.086              | 0.549               |                     |          | -                 |
|                                                                                                     | Phase (POST) <sup>(3)</sup>                            | 0.070        | 0.151        | -0.220              | 0.363               |                     |          | -                 |
|                                                                                                     | Test <sup>(2)</sup>                                    | -0.010       | 0.086        | -0.187              | 0.154               | 0.014               | 1        | 0.905             |
|                                                                                                     | Treatment:Phase <sup>(4)</sup>                         |              |              |                     |                     | <b>30.100</b>       | <b>2</b> | <b>&lt;0.001</b>  |
|                                                                                                     | Treatment <sup>(2)</sup> × Phase (STR) <sup>(3)</sup>  | 1.167        | 0.233        | 0.693               | 1.578               |                     |          | -                 |
|                                                                                                     | Treatment <sup>(2)</sup> × Phase (POST) <sup>(3)</sup> | 0.079        | 0.219        | -0.356              | 0.527               |                     |          | -                 |
| Precision                                                                                           | (Intercept)                                            | 1.125        | 0.115        | 0.916               | 1.314               |                     |          | -                 |
|                                                                                                     | <b>Treatment<sup>(2)</sup></b>                         | -0.149       | 0.139        | -0.395              | 0.112               | 1.166               | 1        | 0.280             |
| <b>Full model <i>back centre</i></b>                                                                |                                                        |              |              |                     |                     |                     |          |                   |
| Part                                                                                                | Effects                                                | Coefficients | SE           | CL <sub>lower</sub> | CL <sub>upper</sub> | χ <sup>2</sup>      | df       | p                 |

| Mean                                                                          | (Intercept)                                            | -1.948        | 0.163        | -2.329              | -1.650              |                   |          | -                 |
|-------------------------------------------------------------------------------|--------------------------------------------------------|---------------|--------------|---------------------|---------------------|-------------------|----------|-------------------|
|                                                                               | Treatment <sup>(2)</sup>                               | 0.257         | 0.183        | -0.100              | 0.653               |                   |          | -                 |
|                                                                               | Phase (STR) <sup>(3)</sup>                             | 0.586         | 0.160        | 0.282               | 0.905               |                   |          | -                 |
|                                                                               | Phase (POST) <sup>(3)</sup>                            | 0.290         | 0.159        | -0.013              | 0.632               |                   |          | -                 |
|                                                                               | Test <sup>(2)</sup>                                    | -0.019        | 0.047        | -0.111              | 0.081               | NA <sup>(6)</sup> | 1        | NA <sup>(6)</sup> |
|                                                                               | Treatment:Phase <sup>(4)</sup>                         |               |              |                     |                     | <b>23.825</b>     | <b>2</b> | <b>&lt;0.001</b>  |
|                                                                               | Treatment <sup>(2)</sup> × Phase (STR) <sup>(3)</sup>  | -1.057        | 0.230        | -1.527              | -0.615              |                   |          | -                 |
|                                                                               | Treatment <sup>(2)</sup> × Phase (POST) <sup>(3)</sup> | -0.189        | 0.228        | -0.645              | 0.272               |                   |          | -                 |
| Precision                                                                     | (Intercept)                                            | 1.022         | 0.097        | 0.884               | 1.278               |                   |          | -                 |
|                                                                               | <b>Treatment<sup>(2)</sup></b>                         | <b>-0.167</b> | <b>0.228</b> | <b>-0.445</b>       | <b>0.110</b>        | <b>1.538</b>      | <b>1</b> | <b>0.215</b>      |
| <b>Full model centre</b>                                                      |                                                        |               |              |                     |                     |                   |          |                   |
| Part                                                                          | Effects                                                | Coefficients  | SE           | CL <sub>lower</sub> | CL <sub>upper</sub> | $\chi^2$          | df       | p                 |
| Mean                                                                          | (Intercept)                                            | -2.101        | 0.138        | -2.398              | -1.860              |                   |          | -                 |
|                                                                               | Treatment <sup>(2)</sup>                               | -0.566        | 0.183        | -0.929              | -0.219              |                   |          | -                 |
|                                                                               | Phase (STR) <sup>(3)</sup>                             | -0.203        | 0.157        | -0.510              | 0.108               |                   |          | -                 |
|                                                                               | Phase (POST) <sup>(3)</sup>                            | -0.099        | 0.156        | -0.414              | 0.219               |                   |          | -                 |
|                                                                               | Test <sup>(2)</sup>                                    | -0.045        | 0.047        | -0.133              | 0.037               | 0.939             | 1        | 0.332             |
|                                                                               | Treatment:Phase <sup>(4)</sup>                         |               |              |                     |                     | 2.660             | 2        | 0.264             |
|                                                                               | Treatment <sup>(2)</sup> × Phase (STR) <sup>(3)</sup>  | -0.349        | 0.219        | -0.831              | 0.046               |                   |          | -                 |
|                                                                               | Treatment <sup>(2)</sup> × Phase (POST) <sup>(3)</sup> | -0.103        | 0.217        | -0.520              | 0.317               |                   |          | -                 |
| Precision                                                                     | (Intercept)                                            | 1.254         | 0.108        | 1.087               | 1.515               |                   |          | -                 |
|                                                                               | <b>Treatment<sup>(2)</sup></b>                         | <b>0.555</b>  | <b>3.512</b> | <b>0.223</b>        | <b>0.886</b>        | <b>11.92</b>      | <b>1</b> | <b>&lt;0.001</b>  |
| <b>Reduced model centre without insignificant treatment×phase interaction</b> |                                                        |               |              |                     |                     |                   |          |                   |
| Part                                                                          | Effects                                                | Coefficients  | SE           | CL <sub>lower</sub> | CL <sub>upper</sub> | $\chi^2$          | df       | p                 |
| Mean                                                                          | (Intercept)                                            | -2.028        | 0.122        | -2.296              | -1.818              |                   |          | -                 |
|                                                                               | Treatment <sup>(2)</sup>                               | -0.701        | 0.141        | -0.974              | -0.412              | 23.654            | 1        | <0.001            |
|                                                                               | <b>Phase</b>                                           |               |              |                     |                     | <b>12.350</b>     | <b>2</b> | <b>0.002</b>      |
|                                                                               | Phase (STR) <sup>(3)</sup>                             | -0.383        | 0.110        | -0.610              | -0.160              |                   |          | -                 |
|                                                                               | Phase (POST) <sup>(3)</sup>                            | -0.149        | 0.109        | -0.367              | 0.056               |                   |          | -                 |
|                                                                               | Test <sup>(2)</sup>                                    | -0.048        | 0.047        | -0.143              | 0.045               | 1.066             | 1        | 0.301             |
| Precision                                                                     | (Intercept)                                            | 1.253         | 0.108        | 1.087               | 1.518               |                   |          | -                 |
|                                                                               | <b>Treatment<sup>(2)</sup></b>                         | <b>0.536</b>  | <b>0.158</b> | <b>0.225</b>        | <b>0.826</b>        | <b>11.192</b>     | <b>1</b> | <b>&lt;0.001</b>  |
| <b>Full model forward up<sup>(5)</sup></b>                                    |                                                        |               |              |                     |                     |                   |          |                   |
| Part                                                                          | Effects                                                | Coefficients  | SE           | CL <sub>lower</sub> | CL <sub>upper</sub> | $\chi^2$ or z     | df       | p                 |
| Mean                                                                          | (Intercept)                                            | -2.809        | 0.143        | -3.132              | -2.567              |                   |          | -                 |
|                                                                               | Treatment <sup>(2)</sup>                               | -0.091        | 0.197        | -0.487              | 0.309               | -0.461            |          | 0.645             |
|                                                                               | Phase (STR) <sup>(3)</sup>                             | -0.283        | 0.154        | -0.585              | 0.054               | -1.835            |          | 0.066             |
|                                                                               | Phase (POST) <sup>(3)</sup>                            | 0.046         | 0.153        | -0.255              | 0.361               | 0.301             |          | 0.763             |
|                                                                               | Test <sup>(2)</sup>                                    | 0.064         | 0.046        | -0.021              | 0.154               | 1.392             |          | 0.164             |
|                                                                               | Treatment <sup>(2)</sup> × Phase (STR) <sup>(3)</sup>  | -0.057        | 0.216        | -0.517              | 0.372               | -0.264            |          | 0.792             |
|                                                                               | Treatment <sup>(2)</sup> × Phase (POST) <sup>(3)</sup> | -0.207        | 0.215        | -0.618              | 0.201               | -0.962            |          | 0.336             |

| Precision                                                                                       | (Intercept)                                            | 1.620         | 0.125        | 1.441               | 1.938               |               |          | -                 |
|-------------------------------------------------------------------------------------------------|--------------------------------------------------------|---------------|--------------|---------------------|---------------------|---------------|----------|-------------------|
|                                                                                                 | <b>Treatment<sup>(2)</sup></b>                         | 0.222         | 0.174        | -0.144              | 0.580               | 1.619         |          | 0.203             |
| <b>Reduced model forward up without insignificant treatment×phase interaction<sup>(5)</sup></b> |                                                        |               |              |                     |                     |               |          |                   |
| Part                                                                                            | Effects                                                | Coefficients  | SE           | CL <sub>lower</sub> | CL <sub>upper</sub> | $\chi^2$ or z | df       | p                 |
| Mean                                                                                            | (Intercept)                                            | -2.763        | 0.128        | -3.028              | -2.548              |               |          | -                 |
|                                                                                                 | Treatment <sup>(2)</sup>                               | -0.179        | 0.157        | -0.499              | 0.126               | 1.301         |          | 0.254             |
|                                                                                                 | <b>Phase (STR)<sup>(3)</sup></b>                       | <b>-0.311</b> | <b>0.109</b> | <b>-0.53</b>        | <b>-0.105</b>       | <b>-2.852</b> |          | <b>0.004</b>      |
|                                                                                                 | Phase (POST) <sup>(3)</sup>                            | -0.059        | 0.108        | -0.268              | 0.16                | -0.55         |          | 0.582             |
|                                                                                                 | Test <sup>(2)</sup>                                    | 0.065         | 0.046        | -0.027              | 0.159               | 1.413         |          | 0.158             |
| Precision                                                                                       | (Intercept)                                            | 1.617         | 0.125        | 1.438               | 1.905               |               |          | -                 |
|                                                                                                 | Treatment <sup>(2)</sup>                               | 0.223         | 0.174        | -0.122              | 0.547               | 1.631         | 1        | 0.202             |
| <b>Full model ear low</b>                                                                       |                                                        |               |              |                     |                     |               |          |                   |
| Part                                                                                            | Effects                                                | Coefficients  | SE           | CL <sub>lower</sub> | CL <sub>upper</sub> | $\chi^2$      | df       | p                 |
| Mean                                                                                            | (Intercept)                                            | -2.559        | 0.55         | -3.993              | -1.624              |               |          | -                 |
|                                                                                                 | Treatment <sup>(2)</sup>                               | 0.293         | 0.51         | -0.832              | 1.45                |               |          | -                 |
|                                                                                                 | Phase (STR) <sup>(3)</sup>                             | 2.218         | 0.519        | 1.33                | 3.422               |               |          | -                 |
|                                                                                                 | Phase (POST) <sup>(3)</sup>                            | 0.938         | 0.471        | -0.011              | 1.886               |               |          | -                 |
|                                                                                                 | Test <sup>(2)</sup>                                    | -0.234        | 0.153        | -0.596              | 0.068               | 2.41          | 1        | 0.120             |
|                                                                                                 | Treatment:Phase <sup>(4)</sup>                         |               |              |                     |                     | <b>24.324</b> | <b>2</b> | <b>&lt; 0.001</b> |
|                                                                                                 | Treatment <sup>(2)</sup> × Phase (STR) <sup>(3)</sup>  | -3.431        | 0.765        | -5.404              | -2.013              |               |          | -                 |
|                                                                                                 | Treatment <sup>(2)</sup> × Phase (POST) <sup>(3)</sup> | -1.677        | 0.699        | -3.181              | -0.215              |               |          | -                 |
| Precision <sup>(7)</sup>                                                                        |                                                        |               |              |                     |                     |               |          | -                 |

<sup>(1)</sup> not shown because of having a very limited interpretation <sup>(2)</sup> dummy coded ('reactive' as reference category) <sup>(3)</sup> dummy coded (PRE as reference category) <sup>(4)</sup> the indicated test refers to the overall effect of the interaction between treatment and phase <sup>(5)</sup> overdispersion; SE, z- and p-values corrected for overdispersion (p-value based on Wald's z-approximation; recognizable by no df indicated) <sup>(6)</sup> no p-values available due to convergence problems <sup>(7)</sup> no precision part because of binomial distribution of the ear low model
